# Supplementary material for: Targeted selective supplementation with local plants sustainably improves goat health and decreases anthelmintic drug need on Malawi smallholdings
Source: Research Square preprint supplement (doi:10.21203/rs.3.rs-6235021/v1), 2025-05-06
Supplement: Supplementary file 1 [file 34f18fb5de233527ecc59cf1.docx]

Supplemental Materials for: Targeted selective supplementation with local botanical resources sustainably improves goat health and decreases anthelmintic drug need on Malawi smallholdings

Contents

[S1. Extended Materials & Methods: 3](#_Toc191576397)

[S1.1 Study area and farmer recruitment 3](#_Toc191576398)

[S1.2 Baseline data collection 3](#_Toc191576399)

[S1.3 Bromatological analyses of plant samples 3](#_Toc191576400)

[S1.4 Targeted selective treatment data collection and treatment decisions 3](#_Toc191576401)

[S1.5 Parasitology 4](#_Toc191576402)

[S1.6 Effect of intervention on need for treatment 4](#_Toc191576403)

[S1.7 Resource use and simulated treatment strategies 4](#_Toc191576404)

[S1.8 Statistical analyses 4](#_Toc191576405)

[S2. Extended Results and Discussion 5](#_Toc191576406)

[S2.1 Nutritional analysis of plant-TST experimental plants 5](#_Toc191576407)

[S2.2. Application of TST across smallholders and on field decisions 5](#_Toc191576408)

[S3. Supplemental Figures: 6](#_Toc191576409)

[Fig. S1 Five-point check (FPC) factors determining health status changes 6](#_Toc191576410)

[Fig. S2 Faecal egg count (FEC) reduction 7](#_Toc191576411)

[Fig. S3 Seasonal parasite pressures for control-TST (N=101 goats) and plant-TST (96 goats) groups over the study period. 7](#_Toc191576412)

[Fig. S4 Five Point Check© scores of all goats in the control-TST (N=101 goats) and plant-TST (96 goats) groups over the study period. 8](#_Toc191576413)

[Fig. S5 Proportion of goat statuses in control-TST and Plant-TST regimes scaled by visitation per farm 9](#_Toc191576414)

[Fig. S6 Plant species supplementation frequency by farm visit 10](#_Toc191576415)

[Fig. S7 Kaplan-Meier survival curve analysis of anthelmintic intervention events 11](#_Toc191576416)

[S4. Supplemental Tables: 12](#_Toc191576417)

[Table S1. Factors affecting faecal egg counts under control-TST (N=101 goats) and plant-TST (96 goats) regimens. 12](#_Toc191576418)

[Table S2. Effect of factors on goat bodyweight under control-TST (N=101 goats) and plant-TST (96 goats) regimens. 13](#_Toc191576419)

[Table S4. Anthelmintic use compared to simulated group treatments based on FEC 15](#_Toc191576420)

[Table S4 extended: FEC averages by month based on FPC health score 16](#_Toc191576421)

[Table S5: Natural resource use by farm and experimental plant in under plant-TST (N=96 goats) 17](#_Toc191576422)

[Table S6 – Death statistics pre vs during study in the study area 18](#_Toc191576423)

[Supplemental References: 18](#_Toc191576424)

[S5. Informed consent 20](#_Toc191576425)

## S1. Extended Materials & Methods:

### S1.1 Study area and farmer recruitment

The study was carried out between January 2020 and March 2021. Smallholders who owned goats were selected prior to the study start from four group village head (GVH) areas near the city of Lilongwe in central Malawi. The prevailing climate in the study area is wet tropical with an annual average temperature of 20.7°C and rainfall from 1000 to 1500 mm (Gondwe and Wollny, 2002). Precipitation, Minimum and Maximum temperature data were obtained from January 2020 to March 2021 provided by NOAA/ESRL Physical Sciences Laboratory website (<http://psl.noaa.gov/>).

A meeting was first arranged to explain the methodology and processes. Smallholders were invited to participate in the study according to the following criteria: if they kept at least one adult female goat on the basis that this class of goat is more likely to be retained by farmers throughout the study, goats were considered an important income source of the family and willingness to participate in the study.

### S1.2 Baseline data collection

Each village was visited after smallholder recruitment to explain and demonstrate the FPC. Farmers were given the opportunity to raise and discuss queries before commencing the study. To reinforce participation, farmers were trained and practised the FPC system on adult goats 1. If goats were not already tagged, small plastic ear tags were fitted and identified with a unique ID. During the first visit, approximate age was determined according to knowledge of the owner and goats´ dentition classifying them as >1 year, two, three, four and more than four years 2 , and recorded along with sex, since some male goats were included later in the study. The physiological status was confirmed by the research staff and Vets classifying as pregnant, lactating or dry. Animal weight was estimated from girth at heart level using a calibrated goat weigh tape (Coburn©). Images were collected as part of baseline data collection and record keeping, with images collected in the study area presented here for illustrative purposes showing members of the research team with consent for publication.

### S1.3 Bromatological analyses of plant samples

Plant samples were collected once a month in plastic bags for identification in the herbarium and chemical analysis. Dry matter content was determined at 105 °C until no further loss of weight was recorded. Dried material was then milled to 1 mm and 3 g of the resulting material was furnaced (505 °C for 12 h ramp rate 2 °C/min) to determine the ash content and by mass difference organic matter. Detergent fibre (expressed inclusive of residual ash) was determined as described by Davies et al. with the exception of using oven dried, not freeze-dried material 3. From the soluble material, acid detergent fibre was determined using the Ankom 220 analyser (ANKOM Technology Corp., Macedon, NY, USA). Total N content of the forage was determined by the Kjeldahl technique (FOSS Kjeltec 8400 analyser, Foss Co. Ltd, Denmark). Crude protein was calculated from total N content multiplied by 6.25. Total phenols and total tannins were determined by the Folin-Ciocalteu method 4. The Butanol-HCl method was used to determine condensed tannins content equivalent to leucocyanidins 4.

### S1.4 Targeted selective treatment data collection and treatment decisions

Visits to smallholders were made every two weeks by the research team with results recorded by the research team. Signs of parasitic disease and poor health were evaluated by trained research staff alongside smallholders and local veterinary assistants using the FPC system in each goat: checking the nose, FAMACHA, body condition score (BCS), oedema submandibular and Dag scoring. The BCS was based on the methodology proposed by Honhold et al. 5 from points 1 to 4, including midpoints. Treatment decisions were made in conjunction with smallholders and local veterinary assistants when present. At each evaluation the following was recorded for each individual goat: FPC score, treatment provided (plant, anthelmintic, or untreated), dosage of anthelmintic applied (ml per animal, if applied), lactation status, along with the number of kids per goat. Goats receiving anthelmintic treatment or plant supplementation were marked with a plastic tie around the lower leg and a faecal sample was taken for parasitological analysis.

### S1.5 Parasitology

Faecal samples collected during health evaluations were collected by gloved hands from the anal cavity of individual goats and transferred to individually labelled bags and stored in a refrigerated box at 8°C for transport to the laboratory. Infections with GINs were approximated through faecal nematode egg counts (FECs). FECs were performed on each individual sample collected during FPC scoring, using the McMaster method to estimate egg density (nematode eggs per gram of faeces, EPG) with a multiplication factor of 50 per egg 6. The average daily body weight change (BWC) of each goat was estimated from weigh band records as the difference between the final and the initial weight, divided by the number of days between visits. Weight estimation was performed in the morning before the animals browsed.

### S1.6 Effect of intervention on need for treatment

Kaplan-Meier survival analyses were performed between TST groups, to compare duration of the healthy state unaided by intervention (see section S.18). The survival period (days) per goat was estimated as the difference between the date of first drug treatment and the start of the study. Plant interventions were counted for each goat, identifying if their use could delay the necessity of drug treatment. Therefore, the survival plot estimates the probability of animals staying healthy (not needing drug treatment) for a period with or without plant supplementation in the healthy or borderline states.

### S1.7 Resource use and simulated treatment strategies

Comparing the resource requirements to alternative treatment strategies was performed by accounting for individual goats assessed per month, with individual goats counted once per month to remove duplication. Because all study goats were not counted on all months, totals for whole-herd and group-level were counted as the sum of individual goats assessed per month. Individual goats were counted as sick if they presented as sick by FPC during the month. FECs were calculated as the average FEC from all goats as well as stratified by FPC health status per month.

### S1.8 Statistical analyses

The body weight of female goats, kids’ birthweight, kids’ growth rate and nematode FEC were considered dependent variables and analysed using Shapiro Wilk's test of normality and homogeneity of variance using Levene's test, respectively (Package “ggpubr”). The independent variables were FPC individual components (Nasal discharge, FAMACHA, jaw presence, BCS score, Dag score), TST-treatment (Plant and Drug), location (four GVHs), age (years), physiological status (pregnancy, lactating and dry), health status (Sick, Borderline and Healthy), time (sampling month), household (1-44), and plant species (*F. ingens*, *C. africana* and *G. arborea*). Interactions considering the combinations between TST and health status with the other components were evaluated.

The analytical design was a generalised linear mixed model with repeated measurements (Package “GlmmTMB”). In addition, the individual goats were considered a random factor. Each goat was considered as the experimental unitWe compared Gaussian, Poisson, Negative binomial, and Zero-Inflated binomial distributions and selected the best distribution according to the lowest Akaike Information Criterion value 7. In addition, we used the Package “emmeans” to perform the least-squares mean, applying the function “response” on the significant variables to obtain the log-transformed values and “pairwise” for the means comparisons from the best model 8.

Kaplan-Meier curves were estimated as described by 9 and analysed in R 8. We checked the model's proportional assumption of the individual covariates (Package “survminer, survival”). Additional analysis was undertaken to address the two-tailed hypothesis that, relative to drug-only interventions, prior plant supplementation altered performance of the adult goats or their offspring; and affected parasite infection intensity as measured by FEC. The goats were grouped according to the TST regimen for data analysis. Two proportions Z-test was used to analyse the proportion of goats that needed a drug intervention (i.e., entered the defined sick state) between the experimental groups.

FECs were compared between goats receiving drug intervention in both TST-schemes using Wilcoxon signed-rank test. A paired test was performed comparing FEC (pre-treatment) before the administration of the anthelmintic and the FEC at the next visit two weeks later (post-treatment). Only significant interactions were shown in the results section. Differences were considered significant at P-value <0.05. The power of the tests was analysed using G*power 3.1 statistical software 10. The power of the analysis was >0.80.

## S2. Extended Results and Discussion

### S2.1 Nutritional analysis of plant-TST experimental plants

To assess whether locally available forages identified from the survey were suitable for TST supplementation, samples for each of *C. africana*, *F. ingens*, and *G. arborea* were collected from the study area. Specimens for each species revealed good nutritional profiles across the study area (table 1), with a high crude protein content (>15%). *C. africana* had the highest crude protein content and *F. ingens* the lowest on average across different study site samples. Neutral detergent fibre varied from 26.6% to 48.2%, while the lowest acid detergent fibre value was reported for *C. africana*. Condensed tannin contents ranged from 0.01% to 1.23%, with the highest level in *G. arborea*. All three plant species had less than 2% total phenol content. An extended analysis of these plants in comparison to other locally available forage and browse has been published elsewhere 11.

### S2.2. Application of TST across smallholders and on field decisions

Application of TST was led in conjunction with farmers and veterinary assistants and relied on the continual cooperation with smallholders in the study area. Application of TST was relatively uniform across farms and groups. On an aggregate level 14/23 (60.9%) plant-TST farmers had sick goats at least once during the study, compared to 12/21 (57.1%) of control-TST farmers. Similarly, 22/23 (95.7%) of plant-TST farmers had borderline goats compared to 100% of control-TST. The distribution of sick animals was similar across both groups of smallholders, with a single smallholder in each group identifying sick goats >10% of the time (12.9% for plant-TST, 23% for control-TST), and the remaining either having no sick goats or sick goats were rarely identified (<10% of visits). For borderline status goats, the plant-TST smallholders had an average of 12% (SD 8.15%) of visits with borderline status goats, while control-TST smallholders had an average of 16.6% (SD 10.9%). Together, the implementation of TST strategies did not appear to significantly vary between groups, but smallholders had differing experiences owing to the fact that smallholders did not keep many goats, and the majority of goats did not require interventions.

Being a farmer-led study, farmers and veterinary assistants made decisions at their own discretion, resulting in some on field treatment decisions being made independent of the FPC result. Overall, the vast majority of on field decisions aligned with the FPC treatment decision chart (2946/3050 decisions) showing a significant degree of agreement (Cohen's Kappa = 0.8753, ASE = 0.01178, z = 74.28, Pr(>|z|) = 0). As a result, smallholders in both groups can be said to have adopted this approach for the duration of the study, despite minimal inputs from the research team beyond provisions of FPC tools and anthelmintic doses when necessary.

Reasons for discrepancies between the FPC results and on field decisions were not fully documented, and also include the possibility of human error. The main differences occurred when smallholders opted to provide anthelmintic interventions to healthy goats with nasal discharge (13/2540 instances of FPC healthy goats, or 13/157 instances of healthy goats with nasal discharge), which may be explained by some goats experiencing significant nasal discharge from dusty living conditions and causing concern for smallholders. Alternatively, cases occurred when FPC ranked borderline goats were considered healthy by on field decision (68/435 instances) wherein 65/68 goats had no nasal discharge but some degree of FAMACHA or BCS indicating worsening health. Together, it may be that the presence or absence of nasal discharge, while not a defining feature of the FPC, is a highly visible and obvious cue for interventions that may have swayed treatment decisions.

## S3. Supplemental Figures:


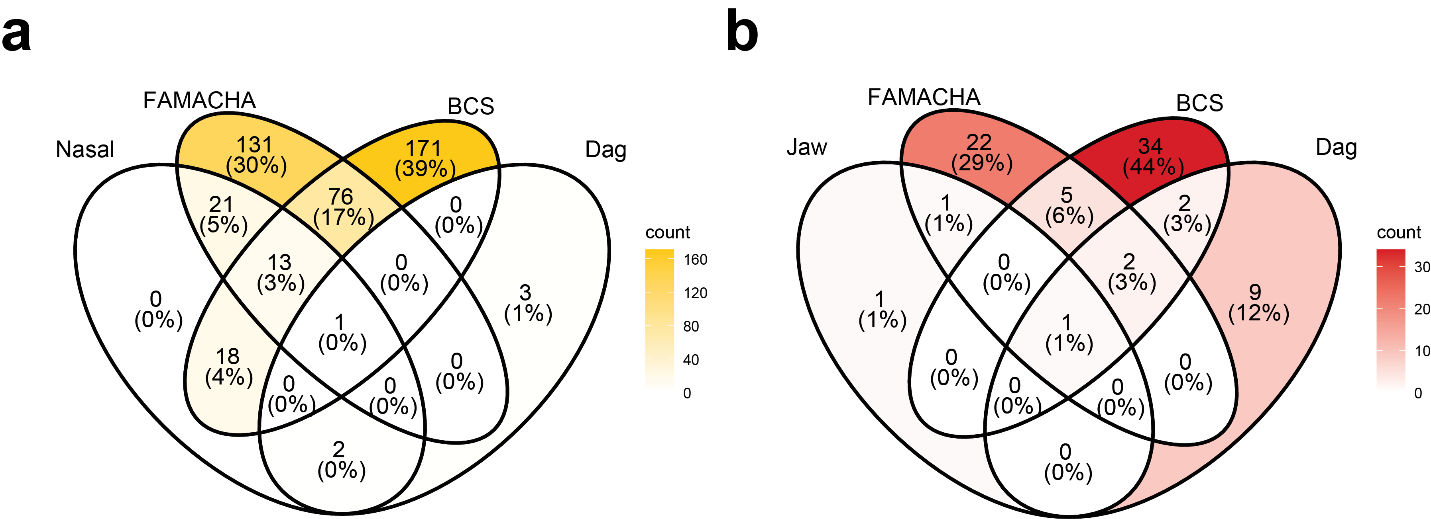


### Supplementary Fig. S1 Five-point check (FPC) factors determining health status changes

The proportion of each FPC indicator present across goats classified as (a) borderline and (b) sick as outlined in Figure 1c. FPC scores were collected for all goats, but scoring was not unanimous across FPC indicators.


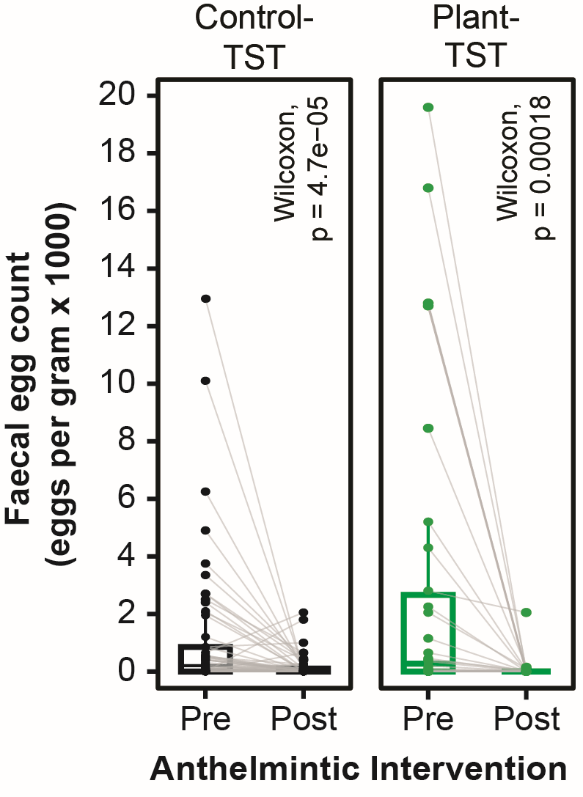


### Supplementary Fig. S2 Faecal egg count (FEC) reduction

FECs of goats treated with albendazole for both control-TST (N=57) and plant TST (N=30) regimes. Faecal samples were collected at the time of initial FPC assessment (Pre) and again ~14 days later at the following assessment (Post).


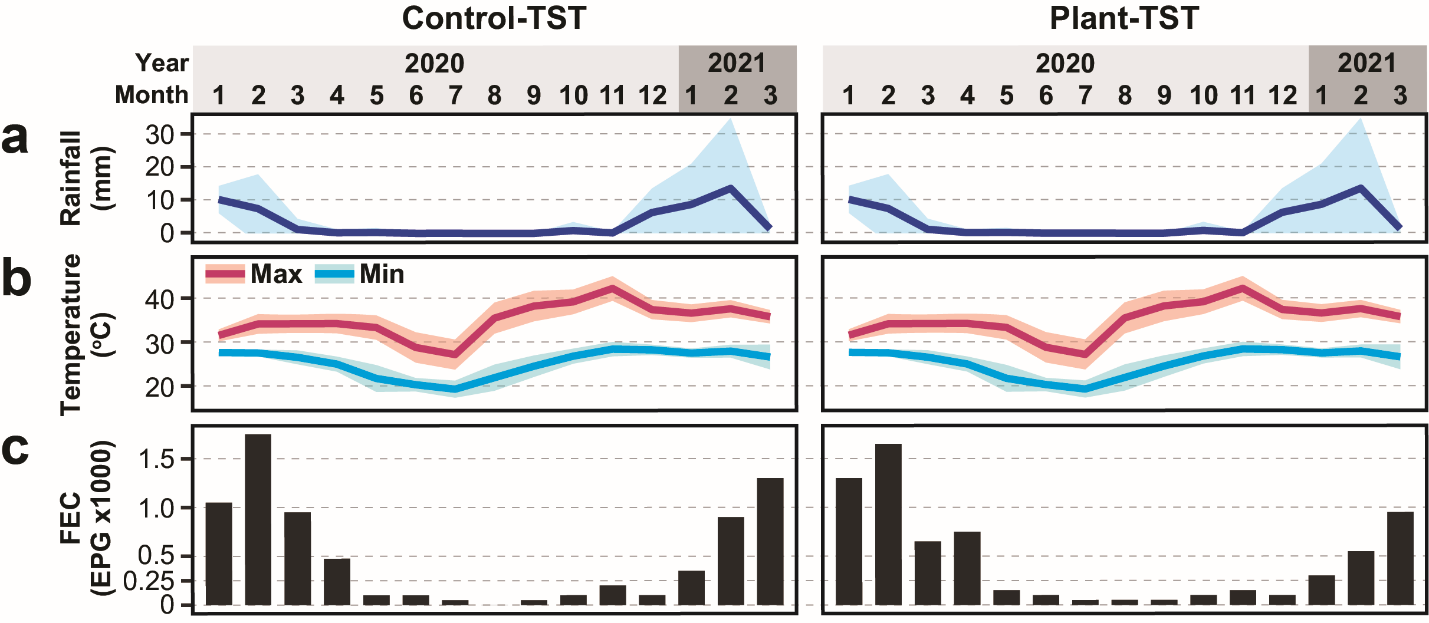


### Supplementary Fig. S3 Seasonal parasite pressures for control-TST (N=101 goats) and plant-TST (96 goats) groups over the study period.

(a-b) Study area rainfall and temperature from NOAA/ESRL Physical Sciences Laboratory open data. (c) Monthly average strongyle nematode parasite abundance from study goats. FEC = faecal worm egg count, EPG = eggs per gram. Rainfall and FECs also shown in table 1.


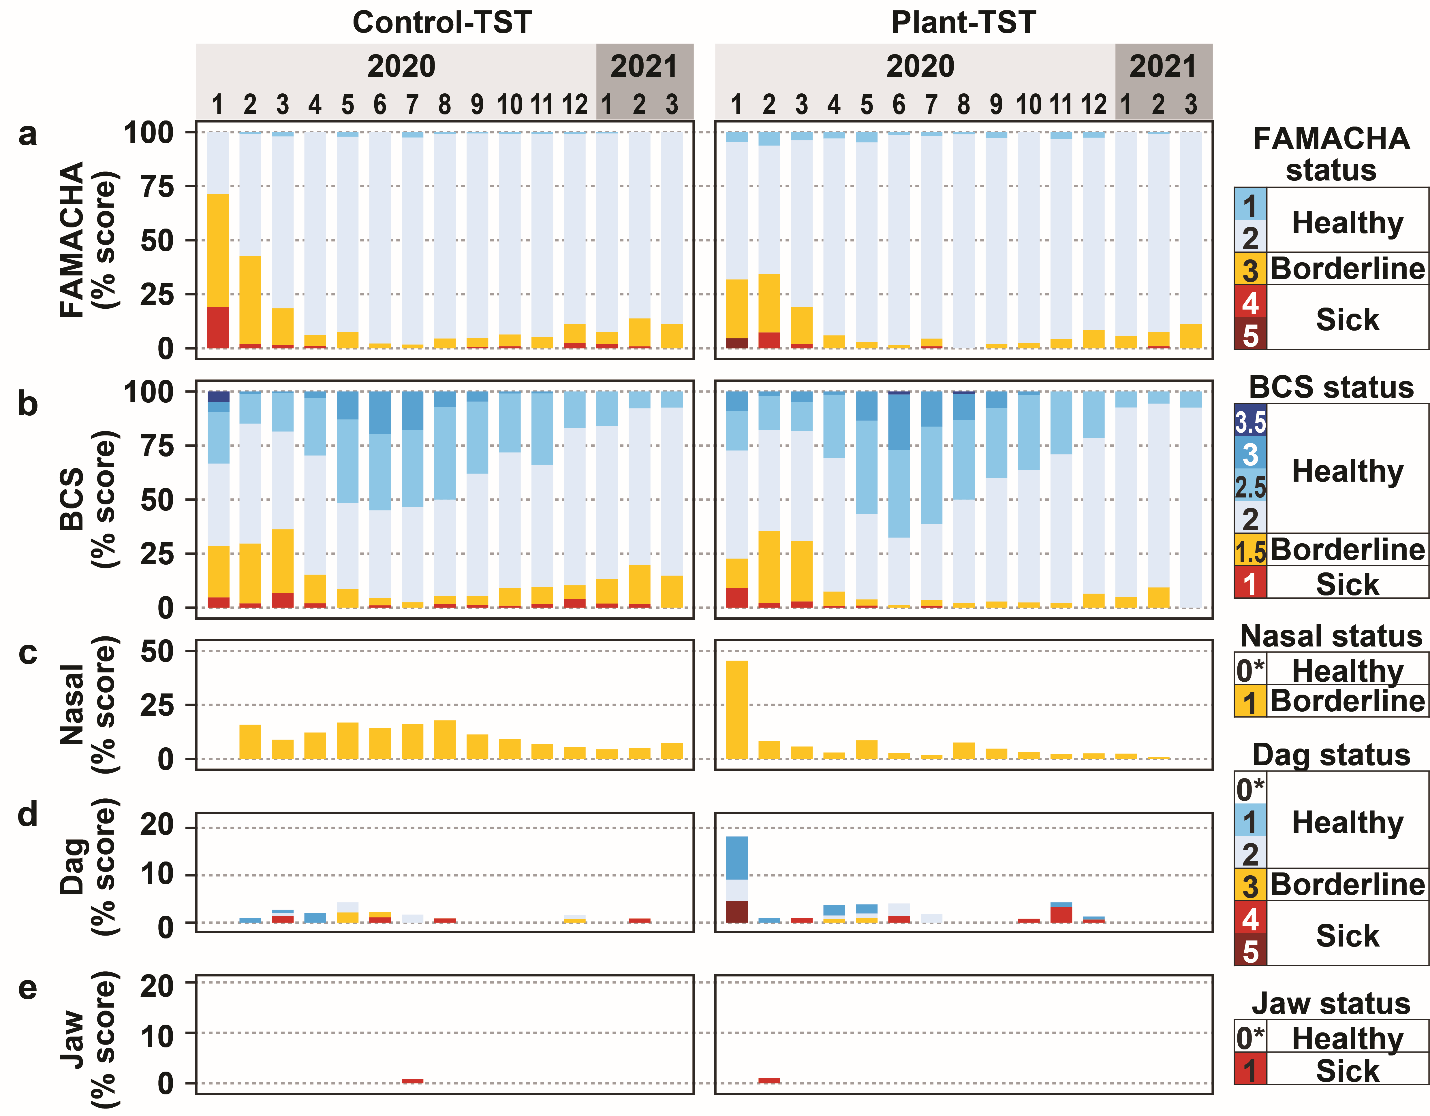


### Supplementary Fig. S4 Five Point Check© scores of all goats in the control-TST (N=101 goats) and plant-TST (96 goats) groups over the study period.

The monthly total measurements of all goats from TST and Plant-TST groups for (a) FAMACHA eye scores, (b) body condition scores, (c) nasal discharge scores, (d) dag / scour scores, (e) bottle jaw / pitting oedema scores.


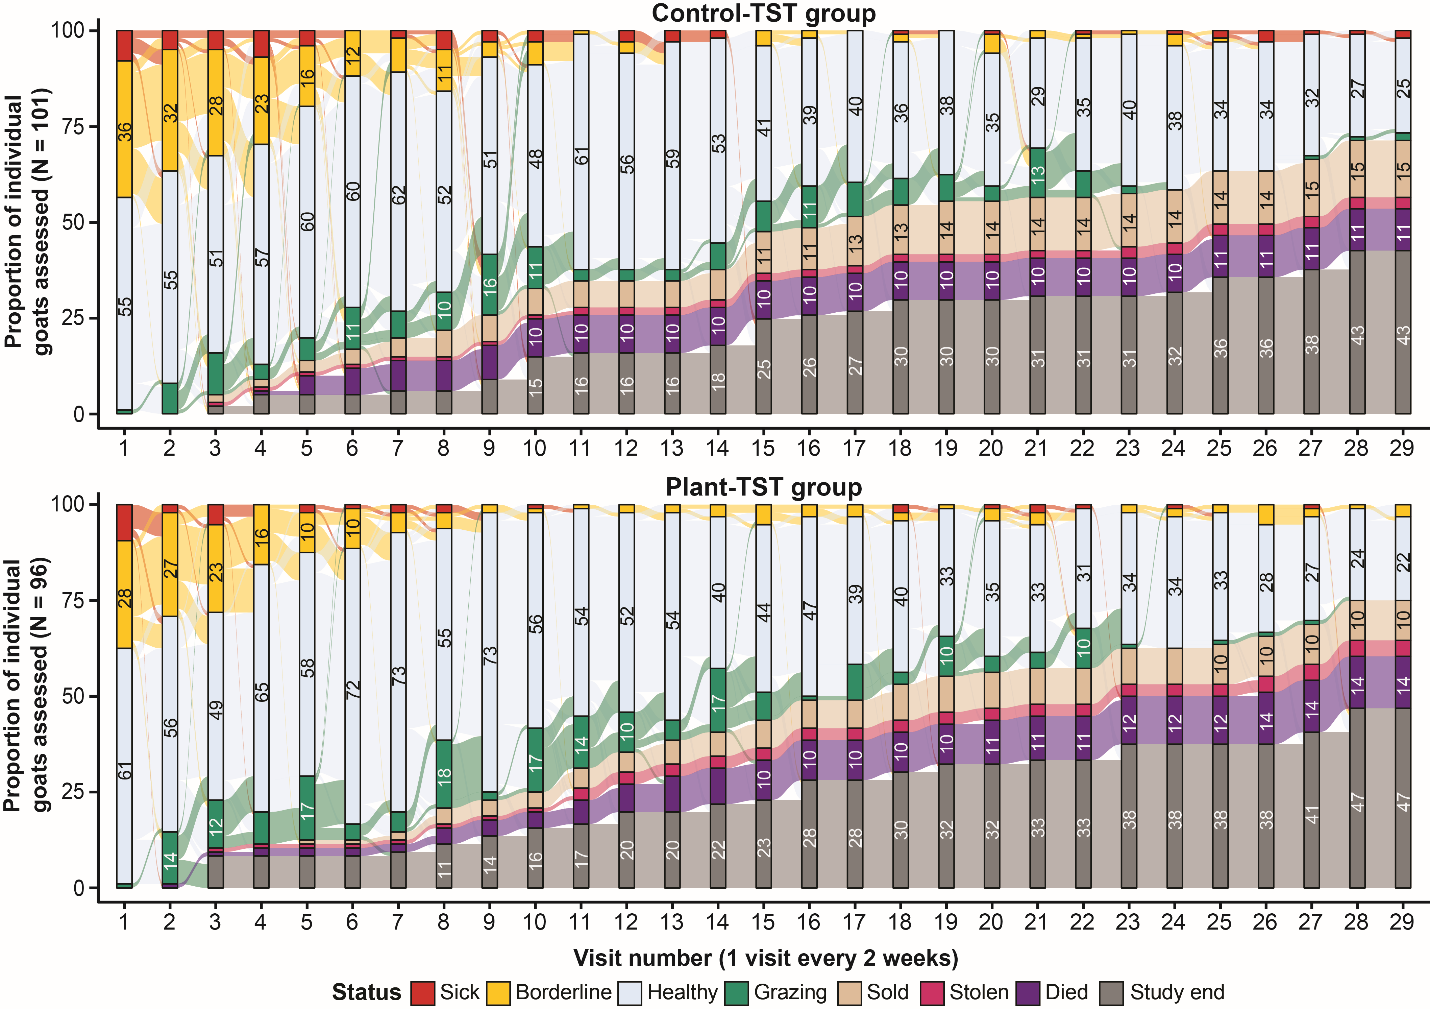


### Supplementary Fig. S5 Proportion of goat statuses in control-TST and Plant-TST regimes scaled by visitation per farm

Individual goat treatments stratified by visit instead of by season. Proportions shown include endpoint of study as goats entered and left the study at different points during monitoring. Proportions ≥10 shown in bars. Grazing = goats out to graze when FPC was performed, study exit = visit number at the end of the study or when farmers left the study.


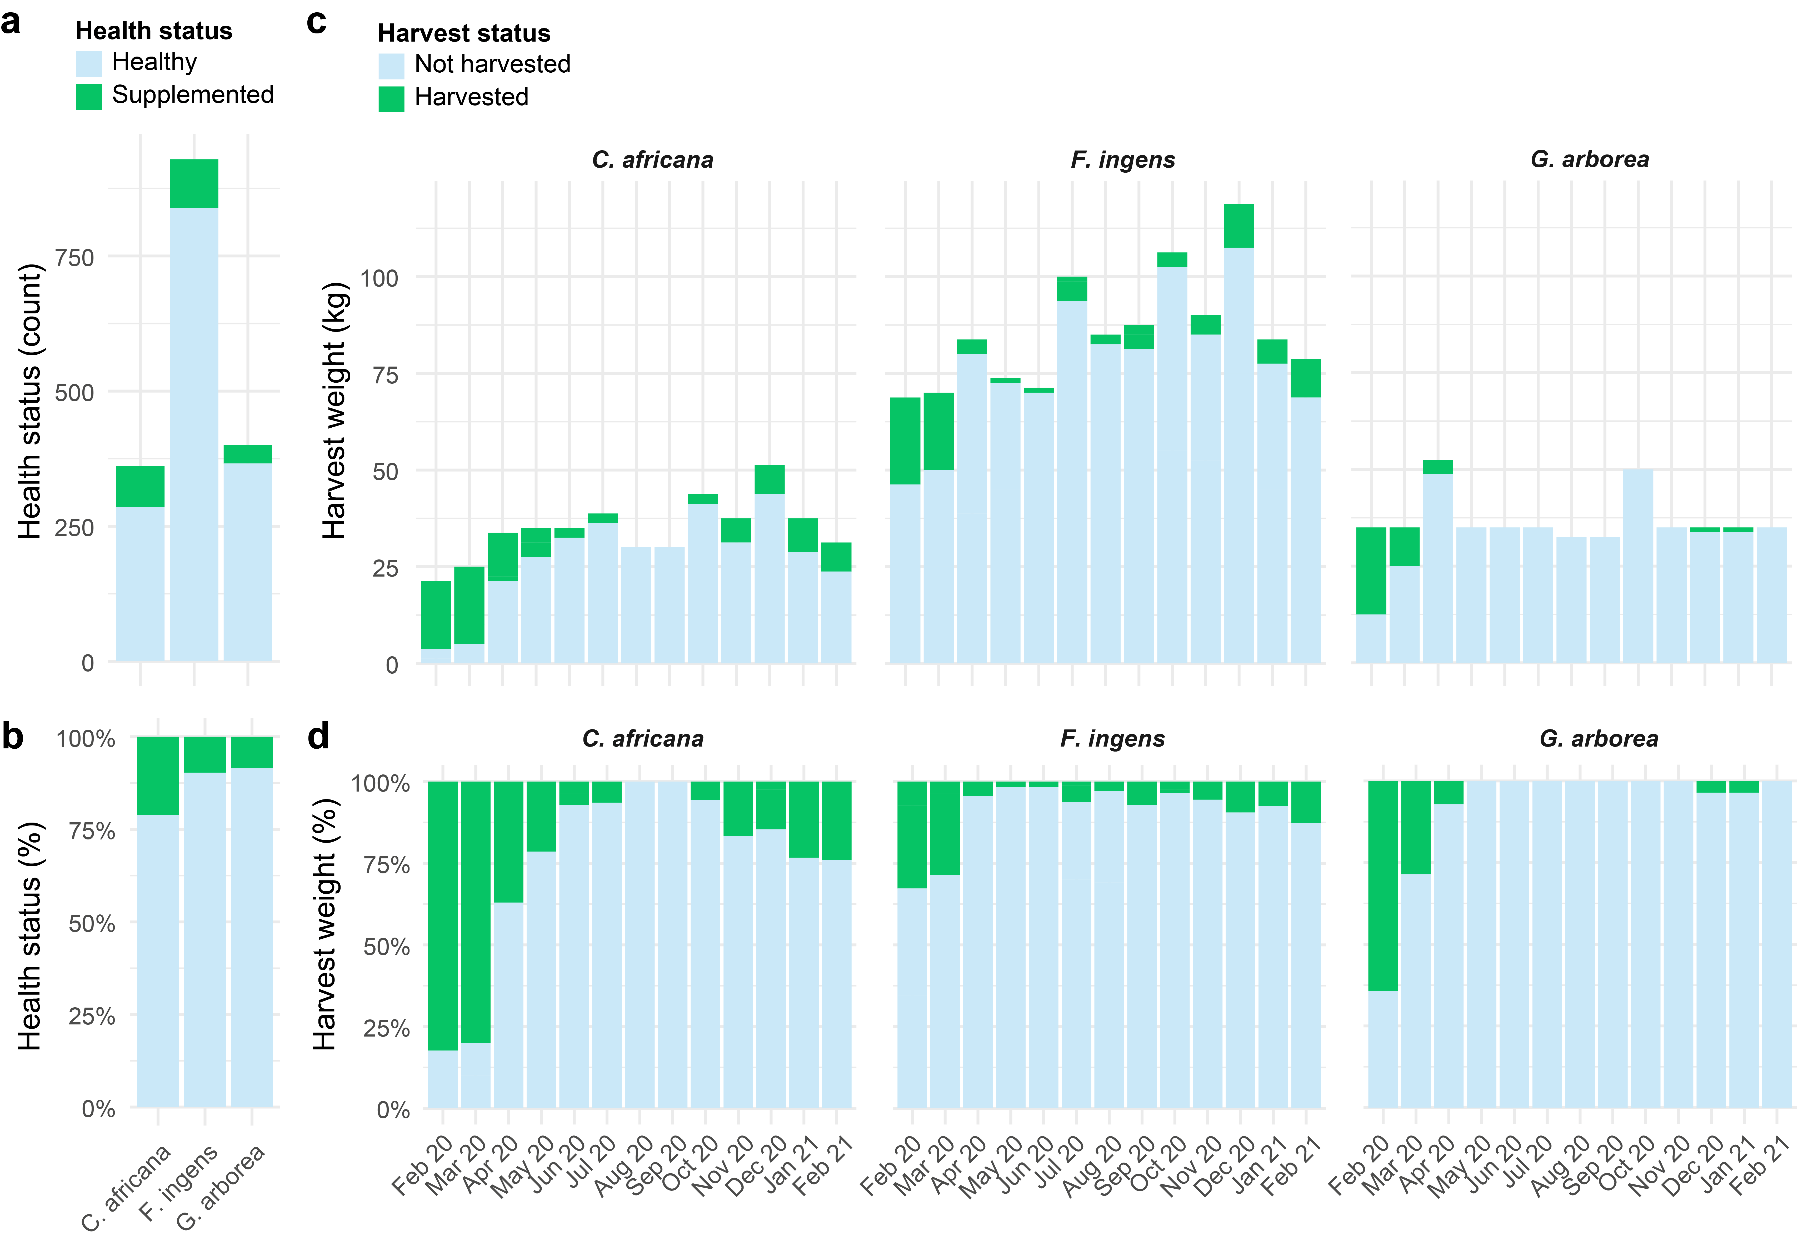


### Supplementary Fig. S6 Plant species supplementation frequency by farm visit

Proportion of visits resulting in supplementations by plant species with (a-b) aggregated by species and (c-d) aggregated by month and species. Visit totals = *C. africana* (N = 363), *F. ingens* (N = 927), and *G. arborea* (N = 400).


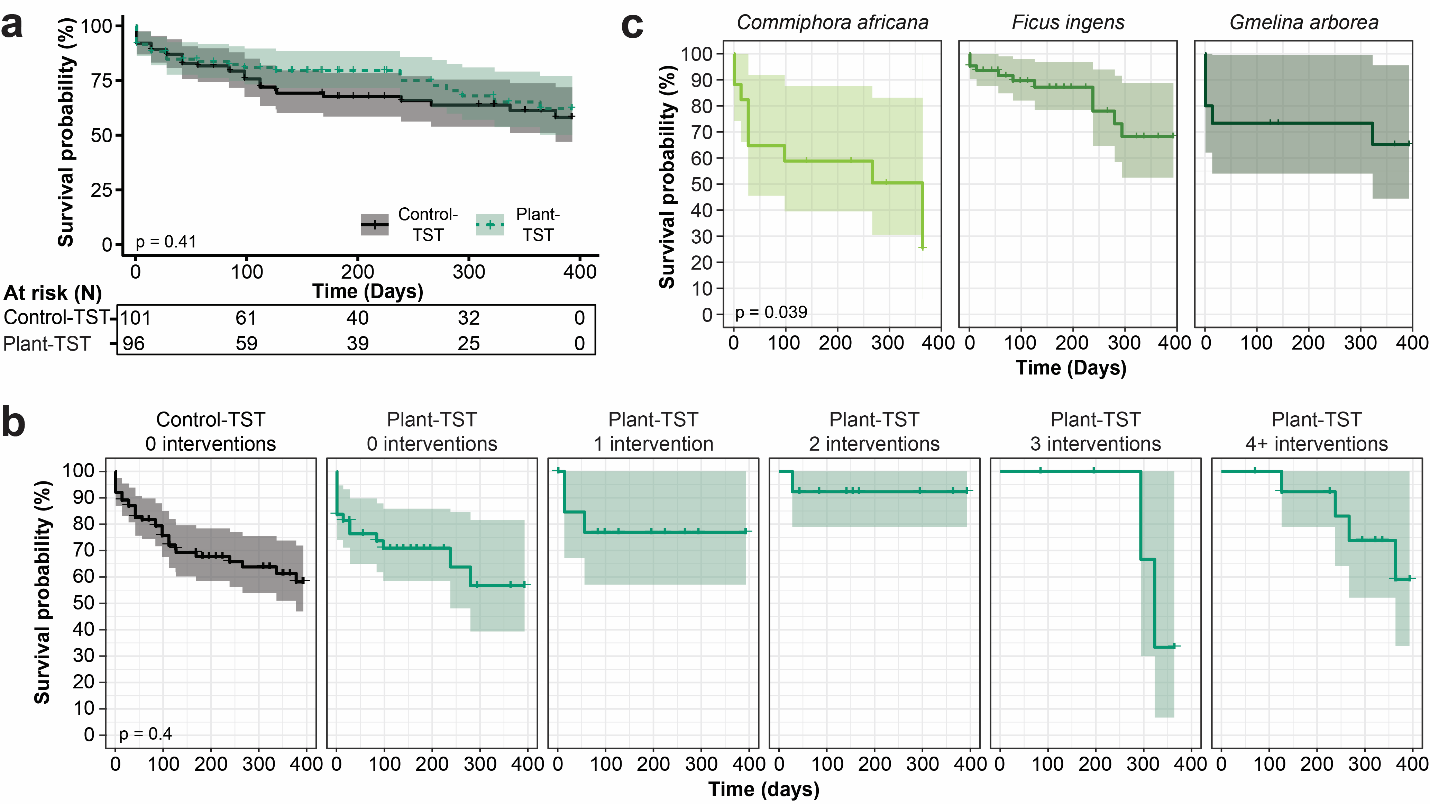


### Supplementary Fig. S7 Kaplan-Meier survival curve analysis of anthelmintic intervention events

(a) TST interventions reduce the number of goats at risk of anthelmintic intervention over time. (b) The number of plant interventions provided does not decrease the likelihood for future interventions. (c) Plant supplementations offered change differ in their impact goat health over time.

## S4. Supplementary Tables:

### Supplementary Table S1. Factors affecting faecal egg counts under control-TST (N=101 goats) and plant-TST (96 goats) regimens.

| Factor | Level | Mean | Lower CL | Upper CL |
| --- | --- | --- | --- | --- |
| FAMACHA | 1 | 458ab | 245 | 855 |
|  | 2 | 383a | 230 | 636 |
|  | 3 | 623b | 371 | 1043 |
|  | 4 | 519ab | 261 | 1032 |
| Body condition score | 1 | 525abc | 287 | 960 |
|  | 1.5 | 1162c | 753 | 1794 |
|  | 2 | 643b | 418 | 988 |
|  | 2.5 | 514a | 333 | 793 |
|  | 3 | 542ab | 334 | 879 |
|  | 3.5 | 124abc | 19 | 798 |
| Dag score | 0 | 533 | 377 | 755 |
|  | 1 | 933 | 435 | 2002 |
|  | 2 | 335 | 109 | 1026 |
|  | 3 | 799 | 254 | 2513 |
|  | 4 | 208 | 77 | 562 |
| On Field Health Status | Sick | 700a | 392 | 1248 |
|  | Healthy | 453ab | 265 | 776 |
|  | Borderline | 366b | 209 | 642 |
| Sampling points | Jan-20 | 1139abcd | 642 | 2022 |
|  | Feb-20 | 1773a | 1049 | 2998 |
|  | Mar-20 | 1156bc | 682 | 1958 |
|  | Apr-20 | 925cd | 544 | 1573 |
|  | May-20 | 292efg | 173 | 493 |
|  | Jun-20 | 211gh | 124 | 357 |
|  | Jul-20 | 166hi | 97 | 283 |
|  | Aug-20 | 123i | 71 | 213 |
|  | Sep-20 | 153hi | 90 | 262 |
|  | Oct-20 | 275fg | 161 | 469 |
|  | Nov-20 | 439e | 257 | 750 |
|  | Dec-20 | 344ef | 202 | 587 |
|  | Jan-21 | 669d | 393 | 1137 |
|  | Feb-21 | 1085bc | 634 | 1855 |
|  | Mar-21 | 1692ab | 941 | 3043 |
| Physiological status | Not Lactating | 465 | 279 | 776 |
|  | Pregnant | 492 | 293 | 828 |
|  | Lactating | 507 | 305 | 844 |

a-h Different literals in the same column in each factor indicate statistical significance p<0.05.

### Supplementary Table S2. Effect of factors on goat bodyweight under control-TST (N=101 goats) and plant-TST (96 goats) regimens.

| Factor | Level | Mean | Lower CL | Upper CL |
| --- | --- | --- | --- | --- |
| FAMACHA | 1 | 31.5ab | 30.3 | 32.7 |
|  | 2 | 31.7b | 30.8 | 32.7 |
|  | 3 | 31.0a | 29.9 | 32 |
|  | 4 | 31.9ab | 30.4 | 33.4 |
|  | 5 | 27.3ab | 18.2 | 36.3 |
| Body condition score | 1 | 29.4a | 27.3 | 31.5 |
|  | 1.5 | 28.7abc | 26.7 | 30.7 |
|  | 2 | 29.6b | 27.7 | 31.6 |
|  | 2.5 | 30.7c | 28.7 | 32.6 |
|  | 3 | 31.9d | 29.9 | 33.9 |
|  | 3.5 | 33.8bcd | 30.2 | 37.4 |
| Nasal discharge | Presence | 30.5 | 28.5 | 32.5 |
|  | Absence | 30.8 | 28.8 | 32.9 |
| Physiological status | Lactating | 30.1a | 28.0 | 32.1 |
|  | Not lactating | 30.1a | 28.1 | 32.1 |
|  | Pregnant | 31.9b | 29.8 | 33.9 |
| Sampling points | Jan-20 | 29.8bcde | 27.7 | 31.9 |
|  | Feb-20 | 29.4bc | 27.4 | 31.4 |
|  | Mar-20 | 27.5a | 25.5 | 29.6 |
|  | Apr-20 | 27.9a | 25.8 | 29.9 |
|  | May-20 | 29.6bc | 27.5 | 31.6 |
|  | Jun-20 | 30.8de | 28.7 | 32.8 |
|  | Jul-20 | 32.0f | 30.0 | 34 |
|  | Aug-20 | 32.4fg | 30.4 | 34.5 |
|  | Sep-20 | 32.6fg | 30.6 | 34.7 |
|  | Oct-20 | 32.8fg | 30.8 | 34.9 |
|  | Nov-20 | 32.3fg | 30.3 | 34.4 |
|  | Dec-20 | 32.9g | 30.8 | 34.9 |
|  | Jan-21 | 31.1e | 29.1 | 33.2 |
|  | Feb-21 | 30.2cd | 28.2 | 32.3 |
|  | Mar-21 | 28.9ab | 26.7 | 31.0 |
| Age | 1 | 26.4a | 24.2 | 28.6 |
|  | 1.5 | 27.0ab | 24.0 | 30.0 |
|  | 2 | 26.0a | 23.6 | 28.4 |
|  | 2.5 | 28.1abc | 24.3 | 31.9 |
|  | 3 | 31.0bc | 28.8 | 33.2 |
|  | 3.5 | 32.5bcd | 28.7 | 36.2 |
|  | 4 | 32.6cd | 30.4 | 34.8 |
|  | 4.5 | 31.1bc | 28.6 | 33.6 |
|  | 5 | 35.8cd | 31.2 | 40.5 |
|  | 5.5 | 36.3d | 33.6 | 38.9 |
| Location | Chinkhowe | 30.7ab | 28.4 | 33.0 |
|  | Kamchezera | 29.8a | 27.6 | 32.0 |
|  | Mazinga | 29.9a | 27.8 | 32.1 |
|  | Mkwinda | 32.3b | 30.0 | 34.5 |
| On Field Health Status | Sick | 30.1 | 28.0 | 32.1 |
|  | Borderline | 31.0 | 28.9 | 33.0 |
|  | Healthy | 31.0 | 29.0 | 33.1 |

a-g Different literals in the same column in each factor indicate statistical significance p<0.05.

**Supplementary** **Table S3. Chemical analysis of experimental plants.**

| Scientific name | Study area | Concentration (%) | | | | | | | | | |
| --- | --- | --- | --- | --- | --- | --- | --- | --- | --- | --- | --- |
| DM | OM | Ash | CP | NDF | ADF | CT* | TP | TT |
| *C. africana* | Chinkhowe | 27.6 | 89.0 | 11.0 | 21.4 | 29.6 | 13.2 | 1.23 | 1.46 | 0 |
| Kamchedzera | 51.5 | 84.1 | 15.9 | 20.8 | 31.0 | 19.6 | 0.06 | 0.85 | 0.17 |
| Mazinga | 24.5 | 88.5 | 11.5 | 22.2 | 37.9 | 22.7 | 1.05 | 0.50 | 0 |
| Mkwinda | 26.1 | 88.4 | 11.6 | 22.2 | 37.5 | 21.7 | 0.99 | 1.00 | 0.07 |
| *F. ingens* | Chinkhowe | 34.2 | 83.5 | 16.5 | 18.1 | 42.6 | 33.0 | 0.01 | 0.65 | 0.06 |
| Kamchedzera | 31.9 | 88.4 | 16.6 | 15.1 | 44.2 | 33.18 | 0.89 | 0.50 | 0.08 |
| Mazinga | 41.6 | 79.4 | 20.7 | 15.5 | 48.2 | 38.1 | 0.67 | 0.39 | 0.09 |
| Mkwinda | 31.5 | 87.9 | 12.1 | 19.1 | 42.5 | 26.8 | 0.04 | 0.91 | 0.03 |
| *G. arborea* | Chinkhowe | 29.9 | 88.9 | 11.1 | 17.9 | 34.2 | 23.9 | 0.12 | 0.50 | 0.14 |
| Kamchedzera | 29.8 | 90.8 | 9.17 | 23.0 | 42.5 | 30.4 | 0.08 | 0.98 | 0.06 |
| Mkwinda | 30.1 | 90.2 | 9.84 | 15.6 | 40.6 | 30.6 | 0.93 | 0.61 | 0.20 |

DM, dry matter; OM, organic matter, CP, crude protein; NDF, neutral detergent fibre; ADF, acid detergent fibre; CT, condensed tannins; TP, total phenols, TT, total tannins. *Equivalent to leucocyanidins.

### Supplementary Table S4. Anthelmintic use compared to simulated group treatments based on FEC

| **Study month** | **Individual goats Assessed** | **TST regime 'Sick' goats** | **Average FEC Pooled (all)** | **N treated with pooled FEC threshold:** | | | **N treatments to non-sick goats (wasted)** | | | **N missed treatments to sick goats** | | | **% treatments to non-sick goats (wasted)** | | | **Once annual treatment (year 1)** | |
| --- | --- | --- | --- | --- | --- | --- | --- | --- | --- | --- | --- | --- | --- | --- | --- | --- | --- |
| 500 | 1000 | 2000 | 500 | 1000 | 2000 | 500 | 1000 | 2000 | 500 | 1000 | 2000 | Wasted (%) | Sick (% of year) |
| 01-Jan | 43 | 6 | 1925.6 | 43 | 43 | 0 | 37 | 37 | 0 | 0 | 0 | 6 | 86.0 | 86.0 | 0.0 | 86.0 | 9.4 |
| 02-Feb | 106 | 10 | 2672.0 | 106 | 106 | 106 | 96 | 96 | 96 | 0 | 0 | 0 | 90.6 | 90.6 | 90.6 | 90.6 | 15.6 |
| 03-Mar | 112 | 14 | 1795.2 | 112 | 112 | 0 | 98 | 98 | 0 | 0 | 0 | 14 | 87.5 | 87.5 | 0.0 | 87.5 | 21.9 |
| 04-Apr | 116 | 2 | 1128.2 | 116 | 116 | 0 | 114 | 114 | 0 | 0 | 0 | 2 | 98.3 | 98.3 | 0.0 | 98.3 | 3.1 |
| 05-May | 114 | 0 | 280.9 | 0 | 0 | 0 | 0 | 0 | 0 | 0 | 0 | 0 | 0.0 | 0.0 | 0.0 | 100.0 | 0.0 |
| 06-Jun | 112 | 2 | 158.4 | 0 | 0 | 0 | 0 | 0 | 0 | 2 | 2 | 2 | 0.0 | 0.0 | 0.0 | 98.2 | 3.1 |
| 07-Jul | 115 | 4 | 123.8 | 0 | 0 | 0 | 0 | 0 | 0 | 4 | 4 | 4 | 0.0 | 0.0 | 0.0 | 96.5 | 6.3 |
| 08-Aug | 132 | 2 | 64.1 | 0 | 0 | 0 | 0 | 0 | 0 | 2 | 2 | 2 | 0.0 | 0.0 | 0.0 | 98.5 | 3.1 |
| 09-Sep | 138 | 5 | 103.0 | 0 | 0 | 0 | 0 | 0 | 0 | 5 | 5 | 5 | 0.0 | 0.0 | 0.0 | 96.4 | 7.8 |
| 10-Oct | 138 | 3 | 218.7 | 0 | 0 | 0 | 0 | 0 | 0 | 3 | 3 | 3 | 0.0 | 0.0 | 0.0 | 97.8 | 4.7 |
| 11-Nov | 139 | 8 | 452.4 | 0 | 0 | 0 | 0 | 0 | 0 | 8 | 8 | 8 | 0.0 | 0.0 | 0.0 | 94.2 | 12.5 |
| 12-Dec | 138 | 8 | 315.9 | 0 | 0 | 0 | 0 | 0 | 0 | 8 | 8 | 8 | 0.0 | 0.0 | 0.0 | 94.2 | 12.5 |
| 13-Jan | 129 | 12 | 847.0 | 129 | 0 | 0 | 117 | 0 | 0 | 0 | 12 | 12 | 90.7 | 0.0 | 0.0 |  |  |
| 14-Feb | 122 | 7 | 1357.3 | 122 | 122 | 0 | 115 | 115 | 0 | 0 | 0 | 7 | 94.3 | 94.3 | 0.0 |  |  |
| 15-Mar | 55 | 2 | 2205.3 | 55 | 55 | 55 | 53 | 53 | 53 | 0 | 0 | 0 | 96.4 | 96.4 | 96.4 |  |  |
| **Total** | 1709 | 85 |  | 683 | 554 | 161 | 630 | 513 | 149 | 32 | 44 | 73 |  |  |  |  | 100 |
| ***Percent of total*** | | ***5.0*** |  | 40.0 | 32.4 | 9.4 | 92.2 | 92.6 | 92.5 | 37.6 | 51.8 | 85.9 |  |  |  |  |  |
| ***Average (>0)*** | |  |  |  |  |  |  |  |  |  |  |  | 92.0 | 92.2 | 93.5 | 94.9 | 9.1 |

### Supplementary Table S4 extended: FEC averages by month based on FPC health score

| **Study month** | **Average FEC** | | | |
| --- | --- | --- | --- | --- |
| **Pooled (all)** | **Healthy** | **Borderline** | **Sick** |
| 01-Jan | 1925.6 | 1731.3 | 1627.8 | 3620.0 |
| 02-Feb | 2672.0 | 1751.2 | 3228.9 | 5418.2 |
| 03-Mar | 1795.2 | 1061.0 | 2838.2 | 2884.6 |
| 04-Apr | 1128.2 | 996.4 | 2211.4 | 1350.0 |
| 05-May | 280.9 | 245.4 | 606.7 |  |
| 06-Jun | 158.4 | 155.1 | 242.9 | 100.0 |
| 07-Jul | 123.8 | 119.0 | 256.3 | 100.0 |
| 08-Aug | 64.1 | 63.2 | 43.8 | 300.0 |
| 09-Sep | 103.0 | 96.5 | 219.2 | 60.0 |
| 10-Oct | 218.7 | 211.3 | 300.0 | 316.7 |
| 11-Nov | 452.4 | 377.3 | 593.3 | 2720.0 |
| 12-Dec | 315.9 | 294.1 | 463.6 | 630.0 |
| 13-Jan | 847.0 | 811.3 | 921.9 | 1404.2 |
| 14-Feb | 1357.3 | 1284.5 | 1509.1 | 2692.9 |
| 15-Mar | 2205.3 | 1965.5 | 6900.0 | 200.0 |

### Supplementary Table S5: Natural resource use by farm and experimental plant in under plant-TST (N=96 goats)

| **Farm** | **Location*** | **Visits** | **Supplement events** | **Goats (N)** | **Harvest (kg)** | **Harvest per goat (kg)** | **Harvest per visit (g)** | **Harvest per day (g)** | **Harvest per goat per day (g)** |
| --- | --- | --- | --- | --- | --- | --- | --- | --- | --- |
| ***C. africana*** | | | | | | | | | |
| P19 | C | 99 | 26 | 4 | 32.5 | 8.1 | 410.4 | 81.5 | 20.4 |
| P21 | C | 51 | 16 | 3 | 20.0 | 6.7 | 490.2 | 50.1 | 16.7 |
| P9 | M | 88 | 9 | 4 | 11.3 | 2.8 | 159.8 | 28.2 | 7.0 |
| P6 | M | 81 | 21 | 3 | 26.3 | 8.8 | 405.1 | 65.8 | 21.9 |
| P13 | M | 44 | 5 | 4 | 6.3 | 1.6 | 177.6 | 15.7 | 3.9 |
|  | ***Total*** | **363** | **77** | **18** | **96.3** | ***5.3*** | **265.2** | **241.2** | **13.4** |
|  | ***Average*** | **72.6** | **15.4** | **3.6** | **19.3** | **5.6** | **328.6** | **48.2** | **14.0** |
| ***F. ingens*** | | | | | | | | | |
| P16 | C | 93 | 3 | 5 | 3.8 | 0.8 | 50.4 | 9.4 | 1.9 |
| P22 | C | 89 | 9 | 5 | 11.3 | 2.3 | 158.0 | 28.2 | 5.6 |
| P23 | C | 81 | 3 | 4 | 3.8 | 0.9 | 57.9 | 9.4 | 2.3 |
| P20 | C | 62 | 0 | 3 | 0.0 | 0.0 | 0.0 | 0.0 | 0.0 |
| P24 | C | 20 | 0 | 2 | 0.0 | 0.0 | 0.0 | 0.0 | 0.0 |
| P3 | M | 98 | 17 | 5 | 21.3 | 4.3 | 271.0 | 53.3 | 10.7 |
| P7 | M | 88 | 8 | 4 | 10.0 | 2.5 | 142.0 | 25.1 | 6.3 |
| P2 | M | 79 | 10 | 4 | 12.5 | 3.1 | 197.8 | 31.3 | 7.8 |
| P12 | M | 77 | 6 | 6 | 7.5 | 1.3 | 121.8 | 18.8 | 3.1 |
| P8 | M | 62 | 3 | 4 | 3.8 | 0.9 | 75.6 | 9.4 | 2.3 |
| P10 | M | 52 | 4 | 3 | 5.0 | 1.7 | 120.2 | 12.5 | 4.2 |
| P4 | M | 52 | 14 | 4 | 17.5 | 4.4 | 420.7 | 43.9 | 11.0 |
| P5 | M | 35 | 2 | 3 | 2.5 | 0.8 | 89.3 | 6.3 | 2.1 |
| P11 | M | 29 | 8 | 3 | 10.0 | 3.3 | 431.0 | 25.1 | 8.4 |
| P1 | M | 10 | 2 | 8 | 2.5 | 0.3 | 312.5 | 6.3 | 0.8 |
|  | ***Total*** | ***927*** | ***89*** | ***63*** | ***111.3*** | ***1.8*** | ***120.0*** | ***278.8*** | ***4.4*** |
|  | ***Average*** | ***61.8*** | ***5.9*** | ***4.2*** | ***7.4*** | ***1.8*** | ***163.2*** | ***18.6*** | ***4.4*** |
| ***G. arborea*** | | | | | | | | | |
| P17 | C | 174 | 16 | 6 | 20.0 | 3.3 | 143.7 | 50.1 | 8.4 |
| P18 | C | 116 | 10 | 4 | 12.5 | 3.1 | 134.7 | 31.3 | 7.8 |
| P15 | C | 110 | 7 | 5 | 8.8 | 1.8 | 99.4 | 21.9 | 4.4 |
|  | ***Total*** | ***400*** | ***33*** | ***15*** | ***41.3*** | ***2.8*** | ***103.1*** | ***103.4*** | ***6.9*** |
|  | ***Average*** | ***133.3*** | ***11*** | ***5*** | ***13.8*** | ***2.7*** | ***125.9*** | ***34.5*** | ***6.9*** |

* C = Chinkhowe, M = Mazinga.

### Supplementary Table S6 – Death statistics pre vs during study in the study area

|  | | Pre-survey  (conducted October-November 2019)* | Plant-TST group (January 2020 – March 2021) | Control-TST group  (January 2020 – March 2021) |
| --- | --- | --- | --- | --- |
| Current ownership of adult goats | | 511 | 96 | 101 |
| Adult goat deaths last year** | | 144 | 12 | 11 |
| % of total | | 28.15% | 12.5% | 10.89% |
| Most recent FPC score prior to death | Healthy | NA | 11 (84.6%) | 2 (15.4%) |
| Borderline | NA | 0 | 5 (38.5%) |
| Sick | NA | 1 (7.7%) | 4 (30.8%) |

* Data represented from previously published analysis conducted within Central Malawi including the study area, however individual respondents vary 12.

** Results represent goats with >2 visits prior to death, removing a single goat (tag ID 20) which died shortly after the initial visitation.

## Supplemental References:

1. Bath, G. F. & van Wyk, J. A. The Five Point Check© for targeted selective treatment of internal parasites in small ruminants. *Small Ruminant Research* **86**, 6–13 (2009).

2. Torres-Acosta, J. F. J. *et al.* Building a combined targeted selective treatment scheme against gastrointestinal nematodes in tropical goats. *Small Ruminant Research* **121**, 27–35 (2014).

3. Davies, D. R. *et al.* Proteolysis during Ensilage of Forages Varying in Soluble Sugar Content. *J Dairy Sci* **81**, 444–453 (1998).

4. Makkar, H. P. S. *Quantification of Tannins in Tree and Shrub Foliage: A Laboratory Manual*. (Kluwer Academic Publishers, Dordrecht, 2003).

5. Honhold, N., Petit, H. & Halliwell, W. Condition scoring scheme for small east african goats in Zimbabwe. *Trop Anim Health Prod* **21**, 121–127 (1989).

6. Bauer, B. U. *et al.* Comparison of the FLOTAC technique with the McMaster method and the Baermann technique to determine counts of *Dictyocaulus eckerti* L1 and strongylid eggs in faeces of red deer (*Cervus elaphus*). *Parasitol Res* **107**, 555–560 (2010).

7. Liddell, C., Morgan, E. R., Bull, K. & Ioannou, C. C. Response to resources and parasites depends on health status in extensively grazed sheep. *Proc Biol Sci* **287**, 1–6 (2020).

8. R Core Team. R: A language and environment for statistical. Preprint at (2013).

9. Kaplan, E. L. & Meier, P. Nonparametric Estimation from Incomplete Observations. *J Am Stat Assoc* **53**, 457–481 (1958).

10. Faul, F., Erdfelder, E., Buchner, A. & Lang, A.-G. Statistical power analyses using G*Power 3.1: Tests for correlation and regression analyses. *Behav Res Methods* **41**, 1149–1160 (2009).

11. Cooke, A. S. *et al.* Nutritional characterisation and seasonal variation of goat forages in Central Malawi. *bioRxiv* 2023.12.22.573017 (2023) doi:10.1101/2023.12.22.573017.

12. Airs, P. M. *et al.* Goat health and management for improved smallholders’ livelihoods in central Malawi – A socioeconomic analysis of rural households. *Small Ruminant Research* **229**, 107114 (2023).

## S5. Informed consent

**
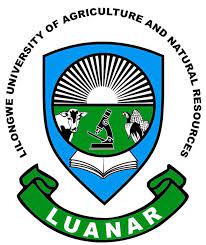
Participant consent form**

**Please tick in the box to the right of each statement if you agree.**

1. I confirm that I have read (or someone has read) the study to me and have understood the information contained in the study. I have had the opportunity to consider the information, ask questions, and have had any questions answered satisfactorily.
2. I agree to take part in this and prior associated studies. I understand that my participation is voluntary and that I am free to stop taking part or can withdraw from the study at any time without reason and without my rights being affected. I understand that I am free to decline to answer any particular question or questions.
3. I understand that the information I provide will be held securely and in line with data protection requirements at LUANAR where it will be fully anonymised with the exception of GPS, and only accessible by authorised researchers to support other research in the future.
4. I understand that other authorised researchers may use my location, words, and images in publications, reports, webpages, and other research outputs.
5. I understand that I can ask for access to the information I provide and I can request the destruction of that information if I so wish at any time prior to 31/07/2025. I understand that following 31/07/2025 I will be able to request access to or withdrawal of the information I provide, but the data may already be in the public domain.
6. I understand that signed consent forms and original study information will be retained in LUANAR and will be digitised for future reference. Original copies will be destroyed and disposed of securely.
7. I understand that personal information collected about me that can identify me, such as my name and where I live will not be shared beyond the study team with the exception of GPS locations for study area. All confidentiality and anonymity otherwise will be maintained, and it will not be possible to identify me specifically in any publications.

**To the person taking consent (if the respondent is unable to provide written consent)**: I have accurately read out the information sheet to the potential participant and, to the best of my ability, ensured that the participant understands to what they are freely consenting:

_________________________________ ___ /____/____ _____________________________

**Participant name Date Signature**

_________________________________ ___ /____/____ _____________________________

**Name of enumerator / interviewer Date Signature**
